# Supplementary material for: Green-fluorescent protein from the bioluminescent jellyfish Clytia gregaria: cDNA cloning, expression, and characterization of novel recombinant protein
Source: Royal Society of Chemistry journal article supplement (doi:10.1039/c0pp00023j), 2010-05-05
Supplement: c0pp00023j.pdf [file c0pp00023j.pdf]

Electronic Supplementary Information for

**Green-fluorescent protein from the bioluminescent jellyfish *Clytia gregaria*:  
cDNA cloning, expression, and characterization of novel recombinant  
protein**

Svetlana V. Markova,<sup>a,b</sup> Ludmila P. Burakova,<sup>a</sup> Ludmila A. Frank,<sup>a,b</sup> Stefan Golz,<sup>c</sup> Kseniya  
A. Korostileva,<sup>a,b</sup> and Eugene S. Vysotski<sup>\*a</sup>

<sup>a</sup> Photobiology Lab, Institute of Biophysics, Russian Academy of Sciences Siberian Branch,  
Akademgorodok 50, Bldg. 50, Krasnoyarsk 660036, Russia.

<sup>b</sup> Siberian Federal University, Krasnoyarsk 660041, Russia

<sup>c</sup> Bayer Schering Pharma AG, BSP-GDD-GTR-TD-GT, 42096 Wuppertal, Germany

\*Corresponding author:

Fax: 7 391 433400; Tel: 7 391 494430;

E-mail: <eugene\_vysotski@ibp.ru> or <eugene.vysotski@gmail.com>

|     |   |       |                             |             |                             |                               |                      |                               |                   |
|-----|---|-------|-----------------------------|-------------|-----------------------------|-------------------------------|----------------------|-------------------------------|-------------------|
|     |   |       | stop                        |             | stop                        |                               | stop                 | 1                             |                   |
|     |   |       |                             |             |                             |                               |                      | M                             | T A               |
| G45 | 1 | ----- | GATCTTCAATCAGAAAGTCAGACGACA | <u>TAGT</u> | <u>TAAA</u>                 | AGGTATAT                      | CTCATTTCACCAAAACAGAG | <u>TAAAAACAAA</u>             | <u>ATGACTGC</u>   |
| G10 | 1 | ----- | GATCTTCAATCAGAAAGTCAGACGACA | <u>TAGT</u> | <u>TAAA</u>                 | AGGTATATTTTCATTTCACCAAAACAGAG | <u>TAAAAACAAA</u>    | <u>ATGACTGC</u>               |                   |
| G2  | 1 | ----- | GATCTTCAATCAGAAAGTCAGACGACA | <u>TAGT</u> | <u>TAAA</u>                 | AGGTATATTTTCATTTCACCAAAACAGAG | <u>TAAAAACAAA</u>    | <u>ATGACTGC</u>               |                   |
| G25 | 1 | GGT   | <u>TAA</u>                  | AGT         | CATCTTCAATCAGAAAGTCAGACGACA | <u>TAGT</u>                   | <u>TAAA</u>          | AGGTATATTTTCATTTCACCAAAACAGAG | <u>TAAAAACAAA</u> |
| G12 | 1 | ----- | GATCTTCAATCAGAAAGTCAGACGACA | <u>TAGT</u> | <u>TAAA</u>                 | AGG-----                      | AGTAAAAACAAA         | <u>ATGACTGC</u>               |                   |
| G4  | 1 | ----- | GATCTTCAATCAGAAAGTCAGACGACA | <u>TAGT</u> | <u>TAAA</u>                 | AGG-----                      | AGTAAAAACAAA         | <u>ATGACTGC</u>               |                   |
| G44 | 1 | ----- | GATCTTCAATCAGAAAGTCAGACGACA | <u>TAGT</u> | <u>TAAA</u>                 | AGGTATATTTTCATTTCACCAAAACAGAG | <u>TAAAAACAAA</u>    | <u>ATGACTGC</u>               |                   |
| G20 | 1 | ----- | GATCTTCAATCAGAAAGTCAGACGACA | <u>TAGT</u> | <u>TAAA</u>                 | AGG-----                      | AGTAAAAACAAA         | <u>ATGACTGC</u>               |                   |
| G1  | 1 | ----- | GATCTTCAATCAGAAAGTCAGACGACA | <u>TAGT</u> | <u>TAAA</u>                 | AGGTATATTTTCATTTCACCAAAACAGAG | <u>TAAAAACAAA</u>    | <u>ATGACTGC</u>               |                   |
| G3  | 1 | ----- | GATCTTCAATCAGAAAGTCAGACGACA | <u>TAGT</u> | <u>TAAA</u>                 | AGGTATATTTTCATTTCACCAAAACAGAG | <u>TAAAAACAAA</u>    | <u>ATGACT</u>                 | <u>A</u>          |

A3T

|     |    |          |                                                                                           |                                                           |    |  |    |
|-----|----|----------|-------------------------------------------------------------------------------------------|-----------------------------------------------------------|----|--|----|
|     |    |          | 10                                                                                        |                                                           | 20 |  | 30 |
|     |    |          | L                                                                                         | T E G A K L F E K E I P Y I T E L E G D V E G M K F I I K |    |  |    |
| G45 | 82 | <u>A</u> | CTTACCGAAGGAGCAAAACTGTTTCGAGAAAGAAATTCCTACATTACAGAGTTGGAAGGAGACGTTGAAGGAATGAAATTCATCATCAA |                                                           |    |  |    |
| G10 | 82 | <u>A</u> | CTTACCGAAGGAGCAAAACTGTTTCGAGAAAGAAATTCCTACATTACAGAGTTGGAAGGAGACGTTGAAGGAATGAAATTCATCATCAA |                                                           |    |  |    |
| G2  | 82 | <u>A</u> | CTTACCGAAGGAGCAAAACTGTTTCGAGAAAGAAATTCCTACATTACAGAGTTGGAAGGAGACGTTGAAGGAATGAAATTCATCATCAA |                                                           |    |  |    |
| G25 | 91 | <u>A</u> | CTTACCGAAGGAGCAAAACTGTTTCGAGAAAGAAATTCCTACATTACAGAGTTGGAAGGAGACGTTGAAGGAATGAAATTCATCATCAA |                                                           |    |  |    |
| G12 | 68 | <u>A</u> | CTTACCGAAGGAGCAAAACTGTTTCGAGAAAGAAATTCCTACATTACAGAGTTGGAAGGAGACGTTGAAGGAATGAAATTCATCATCAA |                                                           |    |  |    |
| G4  | 68 | <u>A</u> | CTTACCGAAGGAGCAAAACTGTTTCGAGAAAGAAATTCCTACATTACAGAGTTGGAAGGAGACGTTGAAGGAATGAAATTCATCATCAA |                                                           |    |  |    |
| G44 | 82 | <u>A</u> | CTTACCGAAGGAGCAAAACTGTTTCGAGAAAGAAATTCCTACATTACAGAGTTGGAAGGAGACGTTGAAGGAATGAAATTCATCATCAA |                                                           |    |  |    |
| G20 | 68 | <u>A</u> | CTTACCGAAGGAGCAAAACTGTTTCGAGAAAGAAATTCCTACATTACAGAGTTGGAAGGAGACGTTGAAGGAATGAAATTCATCATCAA |                                                           |    |  |    |
| G1  | 82 | <u>A</u> | CTTACCGAAGGAGCAAAACTGTTTCGAGAAAGAAATTCCTACATTACAGAGTTGGAAGGAGACGTTGAAGGAATGAAATTCATCATCAA |                                                           |    |  |    |
| G3  | 82 | <u>A</u> | CTTACCGAAGGAGCAAAACTGTTTCGAGAAAGAAATTCCTACATTACAGAGTTGGAAGGAGACGTTGAAGGAATGAAATTCATCATCAA |                                                           |    |  |    |

|     |     |          |                                                                                           |                                                           |    |  |    |
|-----|-----|----------|-------------------------------------------------------------------------------------------|-----------------------------------------------------------|----|--|----|
|     |     |          | 40                                                                                        |                                                           | 50 |  | 60 |
|     |     |          | G                                                                                         | E G T G D A T T G T I K A K Y I C T T G D L P V P W A T I |    |  |    |
| G45 | 172 | <u>A</u> | GGTGAAGGTACTGGCGACGCTACTACTGGCACCATCAAAGCGAAATATATTTGCACAACCTGGTGACCTTCTGTACCATGGGCTACCAT |                                                           |    |  |    |
| G10 | 172 | <u>A</u> | GGTGAAGGTACTGGCGACGCTACTACTGGCACCATCAAAGCGAAATATATTTGCACAACCTGGTGACCTTCTGTACCATGGGCTACCAT |                                                           |    |  |    |
| G2  | 172 | <u>A</u> | GGTGAAGGTACTGGCGACGCTACTACTGGCACCATCAAAGCGAAATATATTTGCACAACCTGGTGACCTTCTGTACCATGGGCTACCAT |                                                           |    |  |    |
| G25 | 181 | <u>A</u> | GGTGAAGGTACTGGCGACGCTACTACTGGCACCATCAAAGCGAAATATATTTGCACAACCTGGTGACCTTCTGTACCATGGGCTACCAT |                                                           |    |  |    |
| G12 | 148 | <u>A</u> | GGTGAAGGTACTGGCGACGCTACTACTGGCACCATCAAAGCGAAATATATTTGCACAACCTGGTGACCTTCTGTACCATGGGCTACCAT |                                                           |    |  |    |
| G4  | 148 | <u>A</u> | GGTGAAGGTACTGGCGACGCTACTACTGGCACCATCAAAGCGAAATATATTTGCACAACCTGGTGACCTTCTGTACCATGGGCTACCAT |                                                           |    |  |    |
| G44 | 172 | <u>A</u> | GGTGAAGGTACTGGCGACGCTACTACTGGCACCATCAAAGCGAAATATATTTGCACAACCTGGTGACCTTCTGTACCATGGGCTACCAT |                                                           |    |  |    |
| G20 | 148 | <u>A</u> | GGTGAAGGTACTGGCGACGCTACTACTGGCACCATCAAAGCGAAATATATTTGCACAACCTGGTGACCTTCTGTACCATGGGCTACCAT |                                                           |    |  |    |
| G1  | 172 | <u>A</u> | GGTGAAGGTACTGGCGACGCTACTACTGGCACCATCAAAGCGAAATATATTTGCACAACCTGGTGACCTTCTGTACCATGGGCTACCAT |                                                           |    |  |    |
| G3  | 172 | <u>A</u> | GGTGAAGGTACTGGCGACGCTACTACTGGCACCATCAAAGCGAAATATATTTGCACAACCTGGTGACCTTCTGTACCATGGGCTACCAT |                                                           |    |  |    |

E35V

|     |     |          |                                                                                           |                                                           |    |  |    |
|-----|-----|----------|-------------------------------------------------------------------------------------------|-----------------------------------------------------------|----|--|----|
|     |     |          | 70                                                                                        |                                                           | 80 |  | 90 |
|     |     |          | L                                                                                         | S S L S Y G V F C F A K Y P R H I A D F F K S T Q P D G Y |    |  |    |
| G45 | 262 | <u>C</u> | TTGAGTAGTTTGTCTGATGGTGTCTTCTGTTTCGCTAAGTATCCACGCCACATTGCCGACTTTTTCAAGAGCACACAACCAGATGGTTA |                                                           |    |  |    |
| G10 | 262 | <u>C</u> | TTGAGTAGTTTGTCTGATGGTGTCTTCTGTTTCGCTAAGTATCCACGCCACATTGCCGACTTTTTCAAGAGCACACAACCAGATGGTTA |                                                           |    |  |    |
| G2  | 262 | <u>C</u> | TTGAGTAGTTTGTCTGATGGTGTCTTCTGTTTCGCTAAGTATCCACGCCACATTGCCGACTTTTTCAAGAGCACACAACCAGATGGTTA |                                                           |    |  |    |
| G25 | 271 | <u>C</u> | TTGAGTAGTTTGTCTGATGGTGTCTTCTGTTTCGCTAAGTATCCACGCCACATTGCCGACTTTTTCAAGAGCACACAACCAGATGGTTA |                                                           |    |  |    |
| G12 | 238 | <u>C</u> | TTGAGTAGTTTGTCTGATGGTGTCTTCTGTTTCGCTAAGTATCCACGCCACATTGCCGACTTTTTCAAGAGCACACAACCAGATGGTTA |                                                           |    |  |    |
| G4  | 238 | <u>C</u> | TTGAGTAGTTTGTCTGATGGTGTCTTCTGTTTCGCTAAGTATCCACGCCACATTGCCGACTTTTTCAAGAGCACACAACCAGATGGTTA |                                                           |    |  |    |
| G44 | 262 | <u>C</u> | TTGAGTAGTTTGTCTGATGGTGTCTTCTGTTTCGCTAAGTATCCACGCCACATTGCCGACTTTTTCAAGAGCACACAACCAGATGGTTA |                                                           |    |  |    |
| G20 | 238 | <u>C</u> | TTGAGTAGTTTGTCTGATGGTGTCTTCTGTTTCGCTAAGTATCCACGCCACATTGCCGACTTTTTCAAGAGCACACAACCAGATGGTTA |                                                           |    |  |    |
| G1  | 262 | <u>C</u> | TTGAGTAGTTTGTCTGATGGTGTCTTCTGTTTCGCTAAGTATCCACGCCACATTGCCGACTTTTTCAAGAGCACACAACCAGATGGTTA |                                                           |    |  |    |
| G3  | 262 | <u>C</u> | TTGAGTAGTTTGTCTGATGGTGTCTTCTGTTTCGCTAAGTATCCACGCCACATTGCCGACTTTTTCAAGAGCACACAACCAGATGGTTA |                                                           |    |  |    |

|     |     |          |                                                                                           |                                                           |     |  |     |
|-----|-----|----------|-------------------------------------------------------------------------------------------|-----------------------------------------------------------|-----|--|-----|
|     |     |          | 100                                                                                       |                                                           | 110 |  | 120 |
|     |     |          | S                                                                                         | Q D R I I S F D N D G Q Y D V K A K V T Y E N G T L Y N R |     |  |     |
| G45 | 352 | <u>T</u> | TACAAGACAGAATCATTAGTTTTGACAATGATGGACAATACGATGTCAAAGCCAAGGTTACTTATGAAAACCGGAACACTTTATAATAG |                                                           |     |  |     |
| G10 | 352 | <u>T</u> | TACAAGACAGAATCATTAGTTTTGACAATGATGGACAATACGATGTCAAAGCCAAGGTTACTTATGAAAACCGGAACACTTTATAATAG |                                                           |     |  |     |
| G2  | 352 | <u>T</u> | TACAAGACAGAATCATTAGTTTTGACAATGATGGACAATACGATGTCAAAGCCAAGGTTACTTATGAAAACCGGAACACTTTATAATAG |                                                           |     |  |     |
| G25 | 361 | <u>T</u> | TACAAGACAGAATCATTAGTTTTGACAATGATGGACAATACGATGTCAAAGCCAAGGTTACTTATGAAAACCGGAACACTTTATAATAG |                                                           |     |  |     |
| G12 | 328 | <u>T</u> | TACAAGACAGAATCATTAGTTTTGACAATGATGGACAATACGATGTCAAAGCCAAGGTTACTTATGAAAACCGGAACACTTTATAATAG |                                                           |     |  |     |
| G4  | 328 | <u>T</u> | TACAAGACAGAATCATTAGTTTTGACAATGATGGACAATACGATGTCAAAGCCAAGGTTACTTATGAAAACCGGAACACTTTATAATAG |                                                           |     |  |     |
| G44 | 352 | <u>T</u> | TACAAGACAGAATCATTAGTTTTGACAATGATGGACAATACGATGTCAAAGCCAAGGTTACTTATGAAAACCGGAACACTTTATAATAG |                                                           |     |  |     |
| G20 | 328 | <u>T</u> | TACAAGACAGAATCATTAGTTTTGACAATGATGGACAATACGATGTCAAAGCCAAGGTTACTTATGAAAACCGGACACTTTATAATAG  |                                                           |     |  |     |
| G1  | 352 | <u>T</u> | TACAAGACAGAATCATTAGTTTTGACAATGATGGACAATACGATGTCAAAGCCAAGGTTACTTATGAAAACCGGAACACTTTATAATAG |                                                           |     |  |     |
| G3  | 352 | <u>T</u> | TACAAGACAGAATCATTAGTTTTGACAATGATGGACAATACGATGTCAAAGCCAAGGTTACTTATGAAAACCGGAACACTTTATAATAG |                                                           |     |  |     |

Y115C



130 140 150  
V T V K G T G F K S N G N I L G M R V L Y H S P P H A V Y I

G45 442 AGTCACAGTCAAAGGTACTGGCTTCAAATCAAACGGCAACATCCTTGGTATGAGAGTTCTCTACCATTACCACCACACGCTGTCTACAT  
G10 442 AGTCACAGTCAAAGGTACTGGCTTCAAATCAAACGGCAACATCCTTGGTATGAGAGTTCTCTACCATTACCACCACACGCTGTCTACAT  
G2 442 AGTCACAGTCAAAGGTACTGGCTTCAAATCAAACGGCAACATCCTTGGTATGAGAGTTCTCTACCATTACCACCACACGCTGTCTACAT  
G25 451 AGTCACAGTCAAAGGTACTGGCTTCAAATCAAACGGCAACATCCTTGGTATGAGAGTTCTCTACCATTACCACCACACGCTGTCTACAT  
G12 418 AGTCACAGTCAAAGGTACTGGCTTCAAATCAAACGGCAACATCCTTGGTATGAGAGTTCTCTACCATTACCACCACACGCTGTCTACAT  
G4 418 AGTCACAGTCAAAGGTACTGGCTTCAAATCAAACGGCAACATCCTTGGTATGAGAGTTCTCTACCATTACCACCACACGCTGTCTACAT  
G44 442 AGTCACAGTCAAAGGTACTGGCTTCAAATCAAACGGCAACATCCTTGGTATGAGAGTTCTCTACCATTACCACCACACGCTGTCTACAT  
G20 418 AGTCACAGTCAAAGGTACTGGCTTCAAATCAAACGGCAACATCCTTGGTATGAGAGTTCTCTACCATTACCACCACACGCTGTCTACAT  
G1 442 AGTCACAGTCAAAGGTACTGGCTTCAAATCAAACGGCAACATCCTTGGTATGAGAGTTCTCTACCATTACCACCACACGCTGTCTACAT  
G3 442 AGTCACAGTCAAAGGTACTGGCTTCAAATCAAACGGCAACATCCTTGGTATGAGAGTTCTCTACCATTACCACCACACGCTGTCTACAT  
**T125A**

160 170 180  
L P D R K N G G M K I E Y N K A F D V M G G G H Q M A R H A

G45 532 CCTTCTGACCGTAAAAATGGTGGCATGAAAATTGAATACAATAAGGCTTTCGACGTTATGGGCGGTGGTCACCAAATGGCGCGTCACGC  
G10 532 CCTTCTGACCGTAAAAATGGTGGCATGAAAATTGAATACAATAAGGCTTTCGACGTTATGGGCGGTGGTCACCAAATGGCGCGTCACGC  
G2 532 CCTTCTGACCGTAAAAATGGTGGCATGAAAATTGAATACAATAAGGCTTTCGACGTTATGGGCGGTGGTCACCAAATGGCGCGTCACGC  
G25 541 CCTTCTGACCGTAAAAATGGTGGCATGAAAATTGAATACAATAAGGCTTTCGACGTTATGGGCGGTGGTCACCAAATGGCGCGTCACGC  
G12 508 CCTTCTGACCGTAAAAATGGTGGCATGAAAATTGAATACAATAAGGCTTTCGACGTTATGGGCGGTGGTCACCAAATGGCGCGTCACGC  
G4 508 CCTTCTGACCGTAAAAATGGTGGCATGAAAATTGAATACAATAAGGCTTTCGACGTTATGGGCGGTGGTCACCAAATGGCGCGTCACGC  
G44 532 TCTTCTGACCGTAAAAATGGTGGCATGAAAATTGAATACAATAAGGCTTTCGACGTTATGGGCGGTGGTCACCAAATGGCGCGTCACGC  
G20 508 TCTTCTGACCGTAAAAATGGTGGCATGAAAATTGAATACAATAAGGCTTTCGACGTTATGGGCGGTGGTCACCAAATGGCGCGTCACGC  
G1 532 TCTTCTGACCGTAAAAATGGTGGCATGAAAATTGAATACAATAAGGCTTTCGACGTTATGGGCGGTGGTCACCAAATGGCGCGTCACGC  
G3 532 TCTTCTGACCGTAAAAATGGTGGCATGAAAATTGAATACAATAAGGCTTTCGACGTTATGGGCGGTGGTCACCAAATGGCGCGTCACGC

190 200 210  
Q F N K P L G A W E E D Y P L Y H H L T V W T S F G K D P D

G45 622 CCAATTCAATAAACCCTAGGAGCCTGGGAAGAAGATTATCCGTTGTATCATCATCTTACCGTATGGACTTCTTTTCGGAAGATCCGGA  
G10 622 CCAATTCAATAAACCCTAGGAGCCTGGGAAGAAGATTATCCGTTGTATCATCATCTTACCGTATGGACTTCTTTTCGGAAGATCCGGA  
G2 622 CCAATTCAATAAACCCTAGGAGCCTGGGAAGAAGATTATCCGTTGTATCATCATCTTACCGTATGGACTTCTTTTCGGAAGATCCGGA  
G25 631 CCAATTCAATAAACCCTAGGAGCCTGGGAAGAAGATTATCCGTTGTATCATCATCTTACCGTATGGACTTCTTTTCGGAAGATCCGGA  
G12 598 CCAATTCAATAAACCCTAGGAGCCTGGGAAGAAGATTATCCGTTGTATCATCATCTTACCGTATGGACTTCTTTTCGGAAGATCCGGA  
G4 598 CCAATTCAATAAACCCTAGGAGCCTGGGAAGAAGATTATCCGTTGTATCATCATCTTACCGTATGGACTTCTTTTCGGAAGATCCGGA  
G44 592 CCAATTCAATAAACCCTAGGAGCCTGGGAAGAAGATTATCCATTGTATCATCATCTTACCGTATGGACTTCTTTTCGGAAGATCCGGA  
G20 598 CCAATTCAATAAACCCTAGGAGCCTGGGAAGAAGATTATCCATTGTATCATCATCTTACCGTATGGACTTCTTTTCGGAAGATCCGGA  
G1 622 CCAATTCAATAAACCCTAGGAGCCTGGGAAGAAGATTATCCATTGTATCATCATCTTACCGTATGGACTTCTTTTCGGAAGATCCGGA  
G3 622 CCAATTCAATAAACCCTAGGAGCCTGGGAAGAAGATTATCCATTGTATCATCATCTTACCGTATGGACTTCTTTTCGGAAGATCCGGA

220 230  
D D E T D H L T I V E V I K A V D L E T Y R stop

G45 712 TGATGATGAAACTGACCATTGACCATCGTCGAAGTCATCAAAGCTGTTGATTGGAACATACCGTTGATAGCGTTAAACAAAGAAAAA  
G10 712 TGATGATGAAACTGACCATTGACCATCGTCGAAGTCATCAAAGCTGTTGATTGGAACATACCGTTGATAGCGTTAAACAAAGAAAAA  
G2 712 TGATGATGAAACTGACCATTGACCATCGTCGAAGTCATCAAAGCTGTTGATTGGAACATACCGTTGATAGCGTTAAAC-----  
G25 721 TGATGATGAAACTGACCATTGACCATCGTCGAAGTCATCAAAGCTGTTGATTGGAACATACCGTTGATAGCGTTAAACAAAGAAAAA  
G12 688 TGATGATGAAACTGACCATTGACCATCGTCGAAGTCATCAAAGCTGTTGATTGGAACATACCGTTGATAGCGTTAAACAAAGAAAAA  
G4 688 TGATGATGAAACTGACCATTGACCATCGTCGAAGTCATCAAAGCTGTTGATTGGAACATACCGTTGATAGCGTTAAACAAAGAAAAA  
G44 712 TGATGATGAAACTGACCATTGATCATCGTCGAAGTCATCAAAGCTGTTGATTGGAACATACCGTTGATAGCGTTAAACAAAGAAAAA  
G20 688 TGATGATGAAACTGACCATTGATCATCGTCGAAGTCATCAAAGCTGTTGATTGGAACATACCGTTGATAGCGTTAAACAAAGAAAAA  
G1 712 TGATGATGAAACTGACCATTGATCATCGTCGAAGTCATCAAAGCTGTTGATTGGAACATACCGTTGATAGCGTTAAACAAAGAAAAA  
G3 712 TGATGATGAAACTGACCATTGATCATCGTCGAAGTCATCAAAGCTGTTGATTGGAACATACCGTTGATAGCGTTAAACAAAGAAAAA  
**T221N**

G45 802 TTACTC-----GAGTGGTGGGCATCAATCATCATTTTTTTTAAATTTGAAAGAATATTTTCAATAGTTCGTAGAAAGCTGCC  
G10 802 TTACTC-----GAGTGGTGGGCATCAATCATCATTTTTTTTAAATTTGAAAGAATATTTTCAATAGTTCGTAGAAAGCTGCC  
G2 793 -----  
G25 811 TTACTC-----GAGTGGTGGGCATCAATCATCATTTTTTTTAAATTTGAAAGAATATTTTCAATAGTTCGTAGAAAGCTGCC  
G12 778 TTACTC-----GAGTGGTGGGCATCAATCATCATTTTTTTTAAATTTGAAAGAATATTTTCAATAGTTCGTAGAAAGCTGCC  
G4 778 TTACTC-----GAGTGGTGGGCATCAATCATCATTTTTTTTAAATTTGAAAGAATATTTTCAATAGTTCGTAGAAA-----  
G44 802 TTACTCCTCGAGTTTAACTCGAGTGGTGGGCATCAATCATCATTTTTTTTAAATTTGAAAGAATATTTTCAATAGTTCGTAGAAAGCTGCC  
G20 778 TTACTCCTCGAGTTTAACTCGAGTGGTGGGCATCAATCATCATTTTTTTTAAATTTGAAAGAATATTTTCAATAGTTCGTAGAAAGCTGCC  
G1 802 TTACTCCTCGAGTTTAACTCGAGTGGTGGGCATCAATCATCATTTTTTTTAAATTTGAAAGAATATTTTCAATAGTTCGTAGAAAGCTGCC  
G3 802 TTACTCCTCGAGTTTAACTCGAGTGGTGGGCATCAATCATCATTTTTTTTAAATTTGAAAGAATATTTTCAATAGTTCGTAGAAAGCTGCC



G45 878 GTCTATTATAATATTTATATATTTTGTGTTTATTTCAACCCACTTTTAAAGATCATTCTAGAAGCACTGCTTTTTTCATTAGGTATGTATG  
G10 878 GTCTATTATAATATTTATATATTTTGTGTTTATTTCAACCCACTTTTAAAGATCATTCTAGAAGCACTGCTTTTTTCATTAGGTATGTATG  
G2 793 -----  
G25 887 GTCTATTATAATATTTATATATTTTGTGTTTATTTCAACCCACTTTTAAAGATCATTCTAGAAGCACTGCTTTTTTCATTAGGTATGTATG  
G12 854 GTCTATTATAATATTTATATATTTTGTGTTTATTTCAACCCACTTTTAAAGATCATTCTAGAAGCACTGCTTTTTTCATTAGGTATGTATG  
G4 848 -----  
G44 892 GTCTATTATAATATTTATATATTTTGTGTTTATTTCAACCCACTTTTAAAGATCATTCTAGAAGCACTGCTTTTTTCATTAGGTATGTATG  
G20 868 GTCTATTATAATATTTATATATTTTGTGTTTATTTCAACCCACTTTTAAAGATCATTCTAGAAGCACTGCTTTTTTCATTAGGTATGTATG  
G1 892 GTCTATTATAATATTTATATATTTTGTGTTTATTTCAACCCACTTTTAAAGATCATTCTAGAAGCACTGCTTTTTTCATTAGGTATGTATG  
G3 892 GTCTATTATAATATTTATATATTTTGTGTTTATTTCAACCCACTTTTAAAGATCATTCTAAGCACTGCTTTTTTCA-----

**PAS**

G45 968 ATGTATTTATTTACAAATGAATAATTACTTTGAGTAAGTTTCTAATCTTCTTCAAGAAATAAAATTACACTTGTTCC-----  
G10 968 ATGTATTTATTTACAAATGAATAATTACTTTGAGTAAGTTTCTAATCTTCTTCAAGAAATAAAATTACACTTGTTCC-----  
G2 793 -----  
G25 977 ATGTATTTATTTACAAATGAATAATTACTTTGAGTAAGTTTCTAATCTTCTTCAAGAAATAAAATTACACTTGTTCCAAATATCCAAGC-  
G12 944 ATGTATTTATTTACAAATGAATAATTACTTTGAGTAAGTTTCTAATCTTCTTCAAGAAATAAAATTACACTTGTTCC-----  
G4 848 -----  
G44 982 ATGTATTTATTTACAAATGAATAATTCTTTGAGTAAGTTTCTAATCTTCTTCAAGAAATAAAATTACACTTGTTCCAAATATCCATAAT  
G20 958 ATGTATTTATTTACAAATGAATAATTCTTTGAGTAAGTTTCTAATCTTCTTCAAGAAATAAAATTACACTTGTTCCG-----  
G1 982 ATGTATTTATTTACAAATGAATAATTCTTTGAGTAAGTTTCTAATCTTCTTCAAGAAATAAAATTACACTTGTTCCAAATATCCCG---  
G3 969 -----

G45 1045 AAAAAAAAAAAAAAAAAAAAAAAAAAAAAA  
G10 1045 AAAAAAAAAAAAAAAAAAAAAAAAAAAAAA--  
G2 793 AAAAAAAAAAAAAAAAAAAAAAAAAAAAAA-  
G25 1066 AAAAAAAAAAAAAAAAAAAAAAAAAAAAAA-  
G12 1011 AAAAAAAAAAAAAAAAAAAAAAAAAAAAAA  
G4 848 AAAAAAAAAAAAAAAAAAAAAAAAAAAAAA--  
G44 1072 AAAAAAAAAAAAAAAAAAAAAAAAAAAAAA  
G20 1036 AAAAAAAAAAAAAAAAAAAAAAAAAAAAAA  
G1 1069 AAAAAAAAAAAAAAAAAAAAAAAAAAAAAA-  
G3 969 AAAAAAAAAAAAAAAAAAAAAAAAAAAAAA--

Fig. S1. A nucleotide alignment of ten complete cDNA sequences of the cgreGFP genes isolated from one specimen of the jellyfish *Clytia gregaria*: G1, G2, G3, G4, G10, G12, G20, G25, G44 and G45. Start codons (ATG) are marked in bold; stop codons – in bold and underlined. There are four stop-codons in 5-untranslated region of the clone cgreGFP25 before the start codon; other clones have 3 stop-codons in 5-untranslated region. A consensus polyadenylation signal PAS (AAATAA) is indicated by blue box. The amino acid sequence encoded by the cDNAs of the first group (cgreGFP2, 4, 10, 12, 25 and 45) having the same coding part is shown over the alignment. The residues forming the chromophore of cgreGFP are highlighted in green. Nucleotide replacements, making cgreGFP clones (44, 1, 3 and 20) different from the first group of cDNA genes are indicated by grey boxes; the resulting amino acid replacements in cgreGFP44 (T221N), cgreGFP20 (T221N and T125A), cgreGFP1 (T221N and Y115C), and cgreGFP3 (T221N, A3T, and E35V) are shown in yellow boxes under the alignment.

The six isolated cgreGFP cDNAs (cgreGFP2, 4, 10, 12, 25, and 45) are evidently various transcripts of one gene. The heterogeneity of untranslated regions seems to result from an alternative splicing, an imprecise cleavage after polyadenylation signal, and/or from annealing of oligo(dT) primer on any poly(A)-stretch in the 3'-untranslated regions instead of the terminal poly(A) tail.

The cgreGFP clones 44, 1, 3, and 20 differing from each other in 1-2 amino acids have four common nucleotide differences resulting in one common amino acid T221N replacement in coding sequences. These clones initially isolated at library screening were not so bright in comparison with other six cgreGFP clones of the first group. However after multiple passages with selection of bright colonies, these clones became brighter that seems to be the result of additional mutations. Thus, these four cgreGFP cDNAs (44, 1, 3, and 20) might originate from various transcripts of the second GFP gene (allelic gene, for example).

|          |     |                                                      |
|----------|-----|------------------------------------------------------|
| C1-III   | 1   | -----MTDTASKYAVKLKTNFEDPK                            |
| C1-I     | 1   | -----MADTASKYAVKLRPNFDNPK                            |
| C1-II    | 1   | MLWFTNRLLSMSALAARSRLQRTANFHTSILLATDSKYAVKLDPDFANPK   |
| I        |     |                                                      |
| C1-III   | 21  | WVNRHKFMFNFLDINGNGKITLDEIVSKASDDICAKLGATPAQTQRHQEA   |
| C1-I     | 21  | WVNRHKFMFNFLDINGDNGKITLDEIVSKASDDICAKLGATPEQTKRHQDA  |
| C1-II    | 51  | WINRHKFMFNFLDINGNGKITLDEIVSKASDDICAKLDATPEQTKRHQDA   |
| C1-III   | 71  | VEAFFKKIGLDYGKEVEFFPAFVNGWKELAKHDLKLWSQNKKSLIRNWGEA  |
| C1-I     | 71  | VEAFFKKIGMDYGKEVEFFPAFVDGWKELANYDLKLWSQNKKSLIRDWGEA  |
| C1-II    | 101 | IEAFFKKMGMDYGKEVPFPEFIKGWEELAKHDLLELWSQNKSTLIREWGDA  |
| II       |     |                                                      |
| C1-III   | 121 | VFDIFDKDGGSGSISLDEWKTYGGISGICPSDEDAEKTFFKHCDLDNSGKLD |
| C1-I     | 121 | VFDIFDKDGGSGSISLDEWKAYGRISGICSSDEDAEKTFFKHCDLDNSGKLD |
| C1-II    | 151 | VFDIFDKDASGSISLDEWKAYGRISGICPSDEDAEKTFFKHCDLDNSGKLD  |
| III      |     |                                                      |
| C1-III   | 171 | VDEMTRQHLGFWYTLDPNADGLYGNFVP                         |
| C1-I     | 171 | VDEMTRQHLGFWYTLDPNADGLYGNFVP                         |
| C1-II    | 201 | VDEMTRQHLGFWYTLDPTSDGLYGNFVP                         |
| Identity |     |                                                      |
| C1-III   | 171 | VDEMTRQHLGFWYTLDPNADGLYGNFVP                         |
| C1-I     | 171 | VDEMTRQHLGFWYTLDPNADGLYGNFVP                         |
| C1-II    | 201 | VDEMTRQHLGFWYTLDPTSDGLYGNFVP                         |

Fig. S2. A comparison of the cloned isotype of the  $\text{Ca}^{2+}$ -regulated photoprotein clytin from jellyfish *Clytia gregaria*, clytin-III (C1-III), with clytin-I (C1-I, AAA28293) [18] and clytin II (C1-II, BAG49088) [19] isotypes. Colors mark amino acid similarity according to properties of the side chains. The letters colored by red show identical residues, blue letters represent similar residues, and black letters show nonidentical residues. The  $\text{Ca}^{2+}$ -binding sites I, II, and III are marked in yellow.

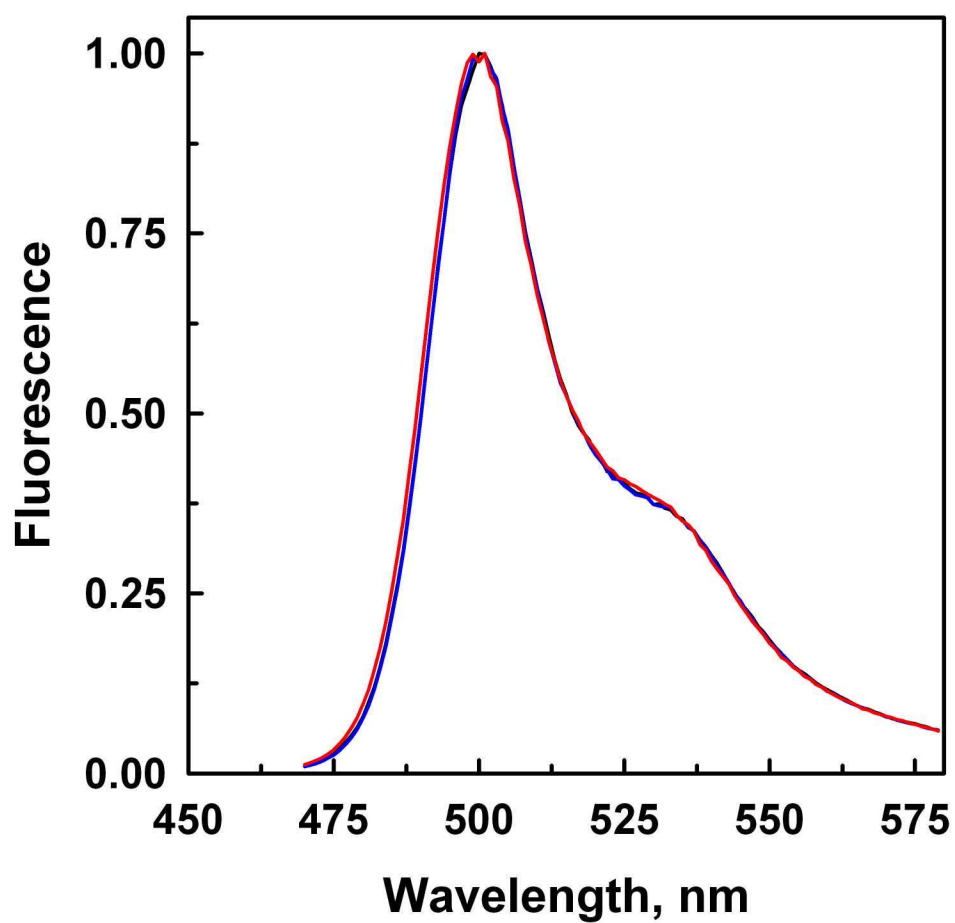

Fig. S3. Normalized fluorescence spectra (excitation at 470 nm) of pure recombinant cgreGFP at pH 5.5 (red), 7.0 (black), and 8.5 (blue).
